# Supplementary material
Source: MDPI journal article supplement (https://www.mdpi.com/1424-8247/17/3/320)

**Supplementary Material**

**Figure S1.** The DLS distribution curves for ZNP-CH, CAZ-ZNP-CH, TOB-ZNP-CH and CAZ-TOB-ZNP-CH in table 1.

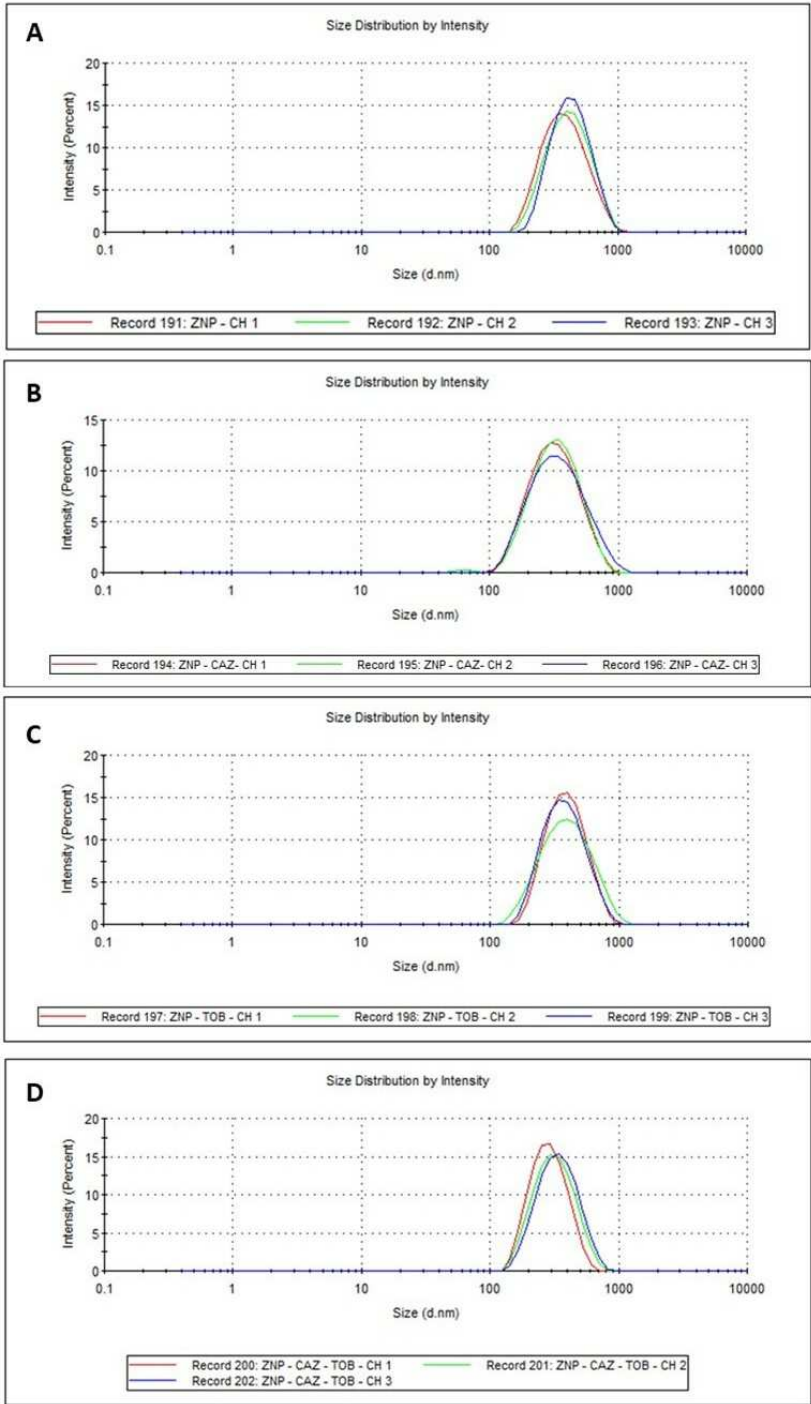

**Figure S2.** Particle size distribution with Average size of ZNP-CH (A), CAZ-ZNP-CH (B), TOB-ZNP-CH (C), and CAZ-TOB-ZNP-CH (D) from SEM images of nanoparticles.  $\bar{\phi}$ : particle size; nm: nanometer.

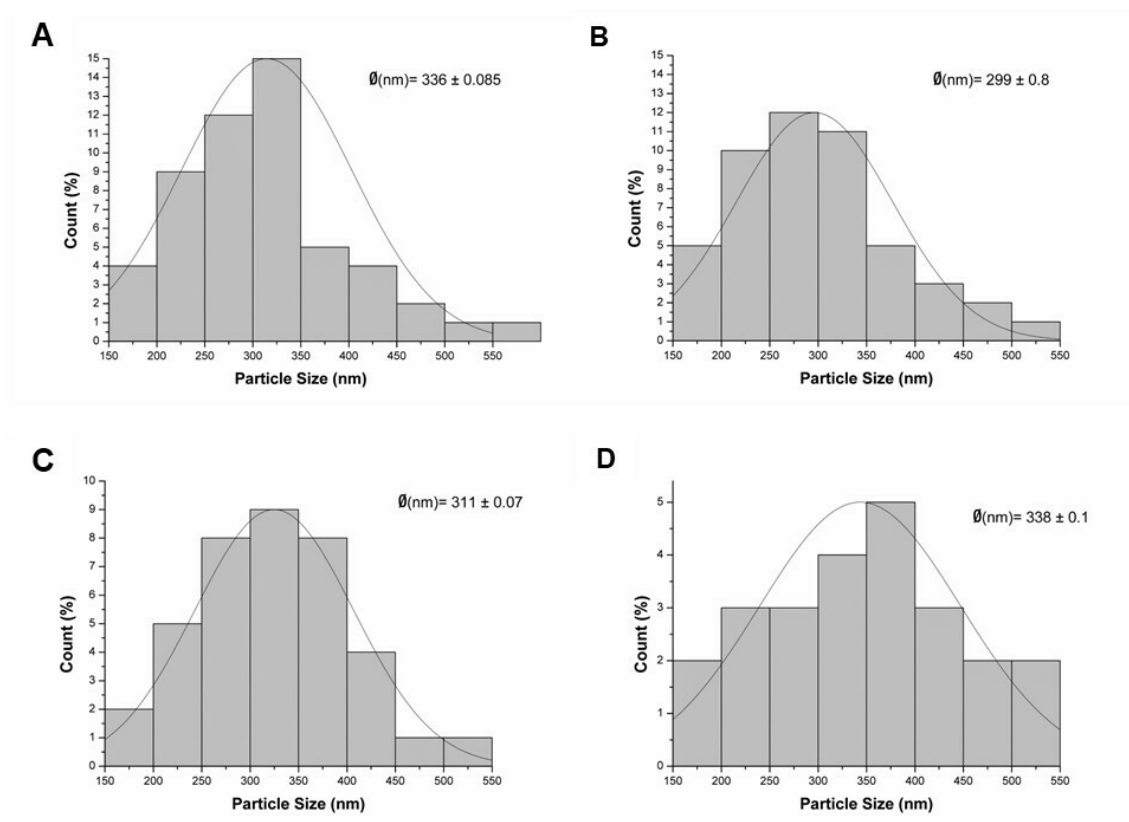

Supplement: s1 [file s1]
